# Supplementary material for: Intestinal Parasitic Infection and Nutritional Status in Children under Five Years Old: A Systematic Review
Source: MDPI journal article supplement (doi:10.3390/tropicalmed7110371), 2022-11-12
Supplement: s1 [file s1]

**Table S1.** Characteristic of the included study

| No . | Author (Year) Country        | Type of study   | Inclusion and Exclusion Criteria                                                                                                                                                                                                               | Age at assessment | No. of cohort and control                                                                    | Intestinal Parasite                                                                                                             | Outcome                                                                                                     | Assessment method                                           | Reason for Exclusion |
|------|------------------------------|-----------------|------------------------------------------------------------------------------------------------------------------------------------------------------------------------------------------------------------------------------------------------|-------------------|----------------------------------------------------------------------------------------------|---------------------------------------------------------------------------------------------------------------------------------|-------------------------------------------------------------------------------------------------------------|-------------------------------------------------------------|----------------------|
| 1    | Aiemjoy et al. (2017)        | Cross-sectional | <b>Inclusion:</b> <ul style="list-style-type: none"> <li>study took place in a rural agrarian region in the Goncha Siso Enese District (woreda) of Amhara, Ethiopia, during dry season</li> <li>children 0–5 years of age</li> <li></li> </ul> | 0-5 years         | 212 samples were collected from 255 randomly selected children                               | Helminths: Ascaris lumbricoides, Trichuris trichiura, and hookworm; Protozoan: Giardia lamblia and Entamoeba histolytica/dispar | Prevalence of intestinal parasites<br><br>Anthropometry                                                     | Kato-Katz<br><br>HAZ<br>WAZ<br>WHZ                          |                      |
| 2    | Ajjampur et al. (2011) India | Cross-section   | <b>Inclusion:</b> <ul style="list-style-type: none"> <li>Children lived in semi-urban slum in Vellore, India</li> <li>Having had at least one episode of cryptosporidial or giardia diarrhoea</li> </ul>                                       | <2 years          | N = 116<br>History of protozoan diarrhoea (n=84)<br>No history of protozoan diarrhoea (n=32) | Protozoa Giardia Cryptosporidial                                                                                                | Anthropometric growth classified as stunted, underweight, wasted<br><br>Social maturity<br><br>Intelligence | HAZ<br>WAZ<br>WHZ<br><br><br>Vineland social maturity sclae |                      |

|   |                             |                    |                                                                                                                                                                                                                                      |                      |                                                                                                          |                                                                                                                                                                                  |                                                                                                                                                  |                                                                                                            |  |
|---|-----------------------------|--------------------|--------------------------------------------------------------------------------------------------------------------------------------------------------------------------------------------------------------------------------------|----------------------|----------------------------------------------------------------------------------------------------------|----------------------------------------------------------------------------------------------------------------------------------------------------------------------------------|--------------------------------------------------------------------------------------------------------------------------------------------------|------------------------------------------------------------------------------------------------------------|--|
|   |                             |                    | <ul style="list-style-type: none"> <li>•Below the age of 2 years</li> <li>•Children with no documented 3cyrptosporidial or giardial infection detected by microscopy (control)</li> <li>•</li> </ul>                                 |                      |                                                                                                          |                                                                                                                                                                                  |                                                                                                                                                  | Seguin Form Board Test2                                                                                    |  |
| 3 | Caron, <i>et al.</i> (2018) | Cohort             | <b>Inclusion:</b> <ul style="list-style-type: none"> <li>• children under 5 years of age, in Cambodia (Kratie and Ratanak Kiri)</li> <li>• area with high prevalence of domestic and livestock animals at household level</li> </ul> | Children under 5 yrs | 639 children - 593 children anthropometric data (Kratie n = 302; Ratanak Kiri n = 291)                   | <i>G. duodenalis</i>                                                                                                                                                             | exposure to animal feces,<br><br>morbidity<br><br>anthropometric                                                                                 | directly to the mother during the interview<br>microscopic examination<br>WFA, HFA,                        |  |
| 4 | Doni <i>et al.</i> (2015)   | case-control study | <b>Inclusion:</b> <ul style="list-style-type: none"> <li>• Children of Şanlıurfa, Turkey</li> <li>• The control and case groups of children were compared in</li> </ul>                                                              | Below 6 yrs old      | Case group- children having a Z-score of <-3 SD: N= 50<br><br>Control group- children without any health | <i>Giardia intestinalis</i><br><i>Enterobius vermicularis</i><br><i>Ascaris lumbricoides</i><br><i>Hymenolepis nana</i><br><i>Trichuris trichiura</i><br><i>Escherichia coli</i> | - Distribution of parasites among case and control groups of children<br>- Relationship between child growth retardation/psychomotor development | - The stool specimens were examined for the presence of parasites, helminth eggs, and larvae and protozoan |  |

|   |                           |         |                                                                                                                                                                                                                                               |             |                                           |                          |                                                                     |                                                                                                                                                                                                                                                                                                                                                                                                             |               |
|---|---------------------------|---------|-----------------------------------------------------------------------------------------------------------------------------------------------------------------------------------------------------------------------------------------------|-------------|-------------------------------------------|--------------------------|---------------------------------------------------------------------|-------------------------------------------------------------------------------------------------------------------------------------------------------------------------------------------------------------------------------------------------------------------------------------------------------------------------------------------------------------------------------------------------------------|---------------|
|   |                           |         | <p>terms of intestinal parasites, physical growth, and cognitive function.</p> <ul style="list-style-type: none"> <li>Controls were from the same community as cases but without the outcome (impaired development and cognition).</li> </ul> |             | complaints and with SDs above -1.99: N=50 | <i>Blastocystis</i> spp. | delay and intestinal parasitic infection                            | <p>cysts using direct wet mount, native-Lugol</p> <ul style="list-style-type: none"> <li>(saline and Lugol's iodine solution), modified formalin-ethyl acetate sedimentation, and acid-fast stained preparations. The cellophane tapes were examined for the presence of <i>Taenia saginata</i> and <i>Enterobius vermicularis</i>.</li> <li>Ankara Child Development Screening Inventory (AGTE)</li> </ul> |               |
| 5 | Gari <i>et al.</i> (2018) | cohorts | <p><b>Inclusion:</b></p> <ul style="list-style-type: none"> <li>Children in Rift Valley</li> </ul>                                                                                                                                            | 6-59 months | 1st approach: non-stunted N=2330, non-    | Plasmodium parasite      | Prevalence of stunting and wasting for the 1 <sup>st</sup> approach | Anthropometry survey; WHZ, HAZ, WAZ                                                                                                                                                                                                                                                                                                                                                                         | Not reporting |

|   |                                           |                 |                                                                                                                                                                                                |                      |                                                                                         |                                                                                                             |                                                                  |                                                                                                                     |                     |
|---|-------------------------------------------|-----------------|------------------------------------------------------------------------------------------------------------------------------------------------------------------------------------------------|----------------------|-----------------------------------------------------------------------------------------|-------------------------------------------------------------------------------------------------------------|------------------------------------------------------------------|---------------------------------------------------------------------------------------------------------------------|---------------------|
|   |                                           |                 | area of Ethiopia<br>- 2 cohort:<br><b>1<sup>st</sup> approach;</b><br>outcome undernutrition-exposure malaria and <b>2<sup>nd</sup> approach;</b><br>outcome malaria – exposure undernutrition |                      | wasted N= 4202<br><br>2nd approach; N= 4468                                             |                                                                                                             | Prevalence of malaria for the 2 <sup>nd</sup> approach           | RDT for malaria based on lateral flow immunochromatography                                                          | intestinal parasite |
| 6 | Gutiérrez - Jiménez, <i>et al.</i> (2019) | Cross section   | <b>Inclusion:</b><br>- Children from rural and urban area in Mexico<br>-                                                                                                                       | Under 5              | 178 children, 84 from Oxchuc- <b>rural</b> , and 94 from Chiapa de Corzo - <b>urban</b> | <i>Ascaris lumbricoides</i><br><i>Entamoeba histolytica/Entamoeba dispar</i><br><i>Giardia intestinalis</i> | - Prevalence of intestinal parasites<br>- Nutritional assessment | - Identification at the species level was performed using the API® 20E identification system<br>- WAZ, HAZ, and WHZ |                     |
| 7 | Gyorkos, <i>et al.</i> (2011)             | Cross sectional | <b>Inclusion:</b><br>- <b>Children living in Belen-</b>                                                                                                                                        | 7–9 and 12–14 months | Participant: 370 children, only 349 had                                                 | Ascaris, Trichuris, hookworm                                                                                | Prevalence patterns of helminth infection in early childhood     | Kato-katz                                                                                                           |                     |



|    |                            |                         |                                                                                                                                                                                         |                |                                                                                                                                                  |                                                                                                                                            |                                                                           |                                                                                                                                                                                                                                       |  |
|----|----------------------------|-------------------------|-----------------------------------------------------------------------------------------------------------------------------------------------------------------------------------------|----------------|--------------------------------------------------------------------------------------------------------------------------------------------------|--------------------------------------------------------------------------------------------------------------------------------------------|---------------------------------------------------------------------------|---------------------------------------------------------------------------------------------------------------------------------------------------------------------------------------------------------------------------------------|--|
|    |                            |                         |                                                                                                                                                                                         |                |                                                                                                                                                  | <i>Ancylostoma duodenale</i> and <i>Hymenolepis nana</i>                                                                                   |                                                                           |                                                                                                                                                                                                                                       |  |
| 10 | Lima, <i>et al.</i> (1992) | cohort                  | <b>Inclusion:</b><br><b>Young children</b> presenting to the outpatient clinic at Hospital das Clinicas <b>in Fortaleza with diarrhea</b> that had persisted <b>longer than 14 days</b> | 1 to 29 months | N=30                                                                                                                                             | <i>Cryptosporidium</i> , enteroadherent <i>E. coli</i>                                                                                     | Nutritional status<br>Prevalence pf intestinal parasite and pathogen      | WAZ<br>Cryptosporidium : monoclonal IFA and modified acid fast staining from stool. Giardia: microscopically detected by direct smear. Rotavirus antigen: detected from fecal specimen by ELISA<br>E.coli tested for r hydrophobicity |  |
| 11 | Lima, <i>et al.</i> (2000) | Cohort and case-control | <b>Inclusion:</b><br><b>Children in northeastern brazil</b><br><b>Children that have diarrhea</b>                                                                                       | 0–3 years      | 189 in cohort, 52 experienced at least 1 episode of PD/ From the 52, 3 could not be matched, and 11 had been designated as controls before onset | <i>Cryptosporidium</i> , <i>Giardia lamblia</i> , <i>Microsporidium</i> , <i>Ascaris</i> , <i>Trichuris</i> , <i>Entamoeba histolytica</i> | Nutritional assessment<br>Etiologic studies of diarrheal illness episodes | WAZ, HAZ, and WHZ<br>Microscopy for parasites and leukocytes by use of iodine-stained and methylene blue–stained wet-mount preparations. Modified acid-fast stain for                                                                 |  |

|    |                           |  |                                                                                                                                                                                                                                                     |            |                                                                           |                                    |                                                                                                                                                                                                                                        |                                                                                                                                                                                                                                                     |                                   |
|----|---------------------------|--|-----------------------------------------------------------------------------------------------------------------------------------------------------------------------------------------------------------------------------------------------------|------------|---------------------------------------------------------------------------|------------------------------------|----------------------------------------------------------------------------------------------------------------------------------------------------------------------------------------------------------------------------------------|-----------------------------------------------------------------------------------------------------------------------------------------------------------------------------------------------------------------------------------------------------|-----------------------------------|
|    |                           |  |                                                                                                                                                                                                                                                     |            | of PD. This gave a total of <b>38 case-control pairs</b> for the analysis |                                    |                                                                                                                                                                                                                                        | <i>Cryptosporidium</i> and <i>Isospora belli</i> ; modified trichrome stain for microsporidium                                                                                                                                                      |                                   |
| 12 | Lin, <i>et al.</i> (2013) |  | <b>Inclusion:</b><br>Bangladeshi children that lives across <b>rural Bangladesh</b> living in different levels of household environmental cleanliness defined by objective indicators of water quality and sanitary and hand-washing infrastructure | ≤48 months | N=119                                                                     | <i>Ascaris, Trichuris, Giardia</i> | <ul style="list-style-type: none"> <li>• Parasite assays</li> <li>• Intestinal permeability assay</li> <li>• Immunological assays</li> <li>• Household water, sanitation, and hygiene conditions</li> <li>• Anthropometrics</li> </ul> | <ul style="list-style-type: none"> <li>• ELISA and direct microscopy</li> <li>• HPLC + PAD</li> <li>• ELISA</li> <li>• Field workers observational spot checks</li> <li>• HAZ, WAZ, WHZ, and HCZ*</li> </ul><br>*head circumference-for-age z score |                                   |
| 13 | Lunn (1991)               |  | <b>Inclusion:</b><br>Children in developing country, Gambia                                                                                                                                                                                         | 2-15       |                                                                           |                                    | Intestinal integrity<br>Anthropometrics                                                                                                                                                                                                | Non-invasive lactose-mannitol permeability test<br>Height and weight                                                                                                                                                                                | No info regarding total number of |

|    |                            |                                  |                                                                                                                                                                                                                                                                                                             |                   |                                                      |                                                                                                          |                                                                        |                                                                                                                          |                            |
|----|----------------------------|----------------------------------|-------------------------------------------------------------------------------------------------------------------------------------------------------------------------------------------------------------------------------------------------------------------------------------------------------------|-------------------|------------------------------------------------------|----------------------------------------------------------------------------------------------------------|------------------------------------------------------------------------|--------------------------------------------------------------------------------------------------------------------------|----------------------------|
|    |                            |                                  | Growth flatering after diarrhoea                                                                                                                                                                                                                                                                            |                   |                                                      |                                                                                                          |                                                                        |                                                                                                                          | children and parasite type |
| 14 | Moffat (2003)              | cross-sectional and longitudinal | <b>Inclusion:</b> <ul style="list-style-type: none"> <li>Children under five years of age living in periurban Kathmandu, Nepal</li> <li>The children's parents are all carpet-making workers who live in an environment with crowded living conditions, poor sanitation, and contaminated water.</li> </ul> | Under 5 years old | N= 71<br>No parasite found= 41<br>Parasite found= 30 | Protozoa: Giardia lamblia, Entamoeba histolyca, etc<br>Nematoda: <i>Ascaris</i> , <i>Trichuris</i> , etc | Anthropometrics<br>Morbidity                                           | HAZ, WAZ, and WHZ<br>Maternal reports, and a subsample of children's stools were examined for gastrointestinal parasites |                            |
| 15 | Moore <i>et al.</i> (2001) | Prospective cohort               | <b>Inclusion:</b><br>Children born in Northeast Brazilian shantytown Goncalves Dias from August 1989 to December 1998                                                                                                                                                                                       | 0-2 years old     | N=119                                                | <i>Ascaris</i> and <i>Trichuris</i>                                                                      | Illness surveillance<br>Nutritional assessment<br>Helminths evaluation | Field workers observation – visited each study home to record diarrhoea<br>HAZ<br>Wet mount, stained with                |                            |



|    |                               |                 |                                                                                                                                                                                                                                                                        |                       |                                                                                                                                                 |                                                                                                    |                                                                                            |                                                                                                     |  |
|----|-------------------------------|-----------------|------------------------------------------------------------------------------------------------------------------------------------------------------------------------------------------------------------------------------------------------------------------------|-----------------------|-------------------------------------------------------------------------------------------------------------------------------------------------|----------------------------------------------------------------------------------------------------|--------------------------------------------------------------------------------------------|-----------------------------------------------------------------------------------------------------|--|
|    |                               |                 | Completed surveillance data and reach the age of 2 years old by December 1998                                                                                                                                                                                          |                       |                                                                                                                                                 |                                                                                                    |                                                                                            | iodine for microscopy                                                                               |  |
| 16 | Moore <i>et al.</i> (2010)    | cohort          | <b>Inclusion:</b><br>Children from shantytown in Brazil, Goncalves Dias<br>The study followed from birth for <b>10 years</b> (August 1989 to March 2000)                                                                                                               | Less than 5 years old | N= 414                                                                                                                                          | <i>Cryptosporidium</i> sp.<br><i>Giardia lamblia</i><br><i>Ascaris</i> sp,<br><i>Trichuris</i> sp. | Diarrhea/illness surveillance<br>Enteric pathogens<br>Anthropometry/Nutritional assessment | Direct observation from visits<br>Microscopy, ELISA, and various other methods<br>WAZ, HAZ, and WHZ |  |
| 17 | Vonaesch <i>et al.</i> (2017) | Cross-sectional | <b>Inclusion:</b><br>(1) aged between 0–59 months;<br>(2) no history of diarrhoea or antibiotics in the 7 days prior to inclusion;<br>(3) in good general health;<br>(4) recruited in the community, Bangui area<br>(5) written consent by the legal representative to | Less than 5 years     | N= 422<br>4 data missing to calculate HAZ<br>4 data outliers<br>Total final data included in the study= 414<br>Non-stunted= 266<br>Stunted= 148 | <i>Cryptosporidium parvum/hominis</i><br><i>Giardia intestinalis</i>                               | Demographic, Socio-economic<br>Anthropometric data<br>Asymptomatic enteropathogen carriage | Survey<br>HAZ, WAZ, zBMI, and WHZ<br>Classical microbiological assays                               |  |

|    |               |                 |                                                                                                                                                               |                    |        |                                                                                                                                                                                            |                                                                                                                                              |                                                                                                                                                       |  |
|----|---------------|-----------------|---------------------------------------------------------------------------------------------------------------------------------------------------------------|--------------------|--------|--------------------------------------------------------------------------------------------------------------------------------------------------------------------------------------------|----------------------------------------------------------------------------------------------------------------------------------------------|-------------------------------------------------------------------------------------------------------------------------------------------------------|--|
|    |               |                 | participate in the study                                                                                                                                      |                    |        |                                                                                                                                                                                            |                                                                                                                                              |                                                                                                                                                       |  |
| 18 | Yoseph (2020) | Cross-sectional | <b>Inclusion:</b><br>Children with caregivers who resided in the Woreda for 6 months<br>Healthy and didn't receive any treatment for 1 month for any diseases | 6 to 59 months old | N= 622 | <i>Giardia lamblia</i><br><i>Entamoeba histoltica</i><br><i>Ascaris lumbricoides</i><br><i>Trichiuris trichiuria</i><br>Hookworm<br><i>Taenia</i> species<br><i>Strongliod stercoralis</i> | Dietary diversity score and nutritional status of children<br>Prevalence of under-nutrition<br>Prevalence of intestinal parasitic infections | HFA, WFA, and WFH<br>Microscopically for the existence of eggs, trophozoites or cysts by using the direct wet mount, Kato Katz and staining technique |  |

**Table S2.** Quality Assessment of the Study based on Joanna Briggs Institute Cross Sectional Study Appraisal Checklist

| Study                                   | 1   | 2   | 3   | 4   | 5                | 6                | 7   | 8                                | Overall Appraisal | Reason for Exclusion                                                                 |
|-----------------------------------------|-----|-----|-----|-----|------------------|------------------|-----|----------------------------------|-------------------|--------------------------------------------------------------------------------------|
| Aiemjoy et al. (2017)                   | Yes | Yes | Yes | Yes | Yes              | Yes              | Yes | Yes                              | Include           |                                                                                      |
| Ajjampur et al. (2011)<br>India         | Yes | Yes | Yes | Yes | Yes, not related | Yes, not related | Yes | Yes                              | Exclude           | History of infection not related to main outcome: physical growth parameters         |
| Caron, <i>et al.</i> (2018)             | Yes | Yes | Yes | Yes | Yes              | Yes              | Yes | Yes                              | Include           |                                                                                      |
| Gutiérrez-Jiménez, <i>et al.</i> (2019) | Yes | Yes | Yes | Yes | No               | No               | Yes | Yes                              | Include           |                                                                                      |
| Gyorkos, <i>et al.</i> (2011)           | Yes | Yes | Yes | Yes | Yes              | Yes              | Yes | Yes                              | Include           |                                                                                      |
| Haratipour, <i>et al.</i> (2016)        | Yes | Yes | Yes | Yes | No               | No               | Yes | Yes                              | Include           |                                                                                      |
| Hegazy, <i>et al.</i> (2014)            | Yes | Yes | Yes | Yes | No               | No               | Yes | Yes                              | Include           |                                                                                      |
| Lima, <i>et al.</i> (1992)              | Yes | Yes | Yes | Yes | No               | No               | Yes | Statistical method not described | Exclude           | The direct correlation measured was between prolong diarrhoea and nutritional status |
| Lima, <i>et al.</i> (2000)              | Yes | Yes | Yes | Yes | No               | No               | Yes | Yes                              | Exclude           | The direct correlation measured was between prolong                                  |

|                               |     |     |     |     |     |     |     |                                                            |         |                                                                                                               |
|-------------------------------|-----|-----|-----|-----|-----|-----|-----|------------------------------------------------------------|---------|---------------------------------------------------------------------------------------------------------------|
|                               |     |     |     |     |     |     |     |                                                            |         | diarrhoea and nutritional status                                                                              |
| Lin, <i>et al.</i> (2013)     | Yes                                                        | Exclude | The direct correlation measured was between contaminated environment and nutritional status                   |
| Moffat (2003)                 | Yes                                                        | Include |                                                                                                               |
| Moore <i>et al.</i> (2001)    | Yes | Statistical method not described<br><br>p-values not shown | Include | The direct correlation measured was between acute, prolonged, and persistent diarrhoea and nutritional status |
| Moore <i>et al.</i> (2010)    | Yes                                                        | Exclude | The direct correlation measured was between acute, prolonged, and persistent diarrhoea and nutritional status |
| Vonaesch <i>et al.</i> (2017) | Yes                                                        | Include |                                                                                                               |
| Yoseph (2020)                 | Yes                                                        | Include |                                                                                                               |

1. Were the criteria for inclusion in the sample clearly defined?
2. Were the study subjects and the setting described in detail?

3. Was the exposure measured in a valid and reliable way?
4. Were objective, standard criteria used for measurement of the condition?
5. Were confounding factors identified?
6. Were strategies to deal with confounding factors stated?
7. Were the outcomes measured in a valid and reliable way?
8. Was appropriate statistical analysis used?

**Table S3.** Quality Assessment of the Study based on Joanna Briggs Institute Case Control Study Appraisal Checklist

| Study                     | 1   | 2   | 3   | 4   | 5   | 6  | 7  | 8   | 9   | 10  | Overall Appraisal | Reason for Exclusion |
|---------------------------|-----|-----|-----|-----|-----|----|----|-----|-----|-----|-------------------|----------------------|
| Doni <i>et al.</i> (2015) | Yes | Yes | Yes | Yes | Yes | No | No | Yes | Yes | Yes | Include           |                      |

1. Were the groups comparable other than the presence of disease in cases or the absence of disease in controls?
2. Were cases and controls matched appropriately?
3. Were the same criteria used for identification of cases and controls?
4. Was exposure measured in a standard, valid, and reliable way?
5. Was exposure measured in the same way for cases and controls?
6. Were confounding factors identified?
7. Were strategies to deal with confounding factors stated?
8. Were outcomes assessed in a standard, valid, and reliable way for cases and controls?
9. Was the exposure period of interest long enough to be meaningful?
10. Was appropriate statistical analysis used?
